# Supplementary material for: Формирование психологических компетенций в системе повышения квалификации специалистов косметологического сервиса
Source: Royal Society of Chemistry journal article supplement (doi:10.1039/c5cp00206k), 2013-01-01
Supplement: c5cp00206k1.pdf [file c5cp00206k1.pdf]

## Supporting Information

### High performance surface-enhanced Raman scattering from molecular imprinting polymers capsulated silver spheres

Yan Guo,<sup>a</sup> Leilei Kang,<sup>a</sup> Shaona Chen<sup>a</sup> and Xin Li<sup>\*b,a</sup>

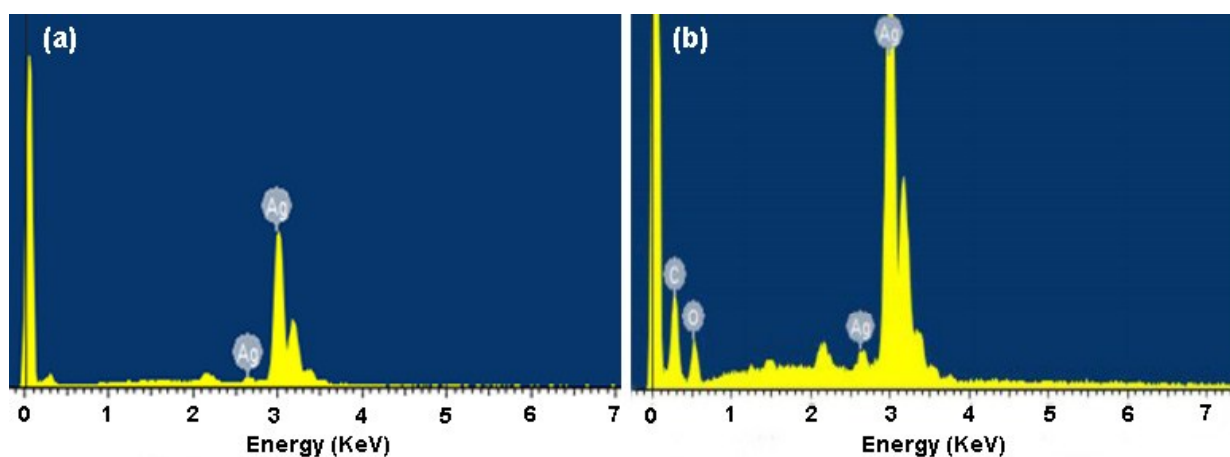

Fig. S1 EDS spectra of Ag spheres (a) and Ag@MIPs (b).

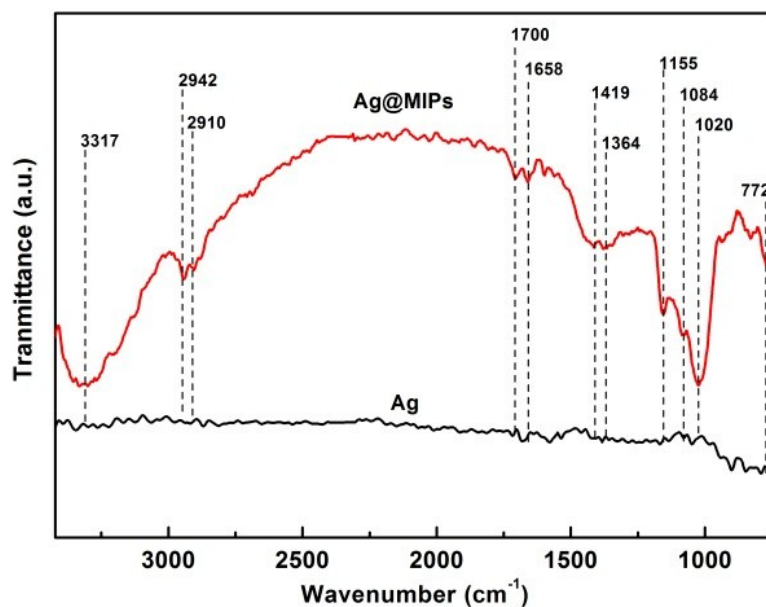

**Fig. S2** The Fourier transform infrared (FTIR) spectra of Ag and Ag@MIPs.

The strong and broad absorption around  $1020\text{ cm}^{-1}$  can be ascribed to the Si-O-Si asymmetric stretching and two weak peaks at  $772\text{ cm}^{-1}$  and  $1364\text{ cm}^{-1}$  are contributed by the Si-O and C-H vibrations of silylation reagent. Two peaks at  $1084\text{ cm}^{-1}$  and  $1155\text{ cm}^{-1}$  are characteristics of the C-O-C vibrations of cross linking agent (EGDMA). The appearance of  $1419\text{ cm}^{-1}$  (C-N stretching vibration),  $1658\text{ cm}^{-1}$  (N-H in-plane bending vibration),  $1700\text{ cm}^{-1}$  (C=O stretching vibration) and  $3317\text{ cm}^{-1}$  (N-H stretching vibration) clearly indicates the presence of functional monomer (acrylamide). Other peaks at  $2942\text{ cm}^{-1}$  and  $2910\text{ cm}^{-1}$  are responsible for the aliphatic C-H stretching vibrations.

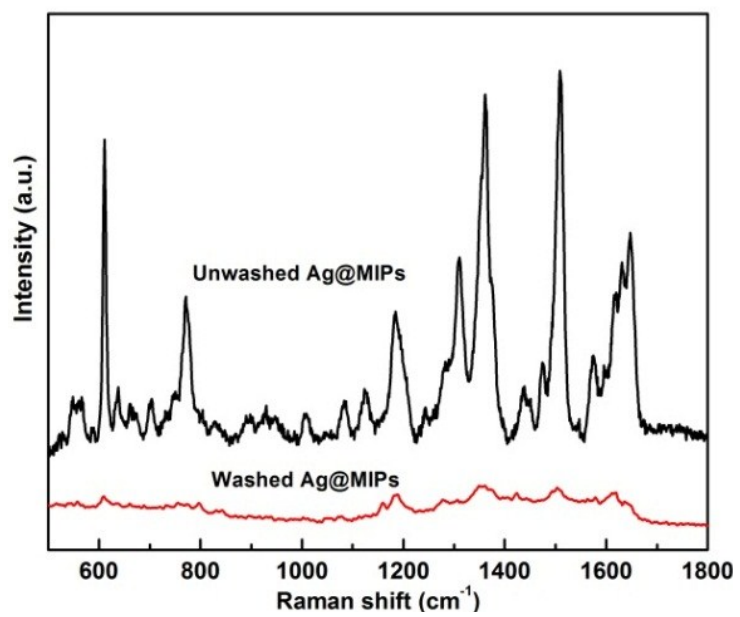

Fig. S3 Raman spectra of washed and unwashed Ag@MIPs.

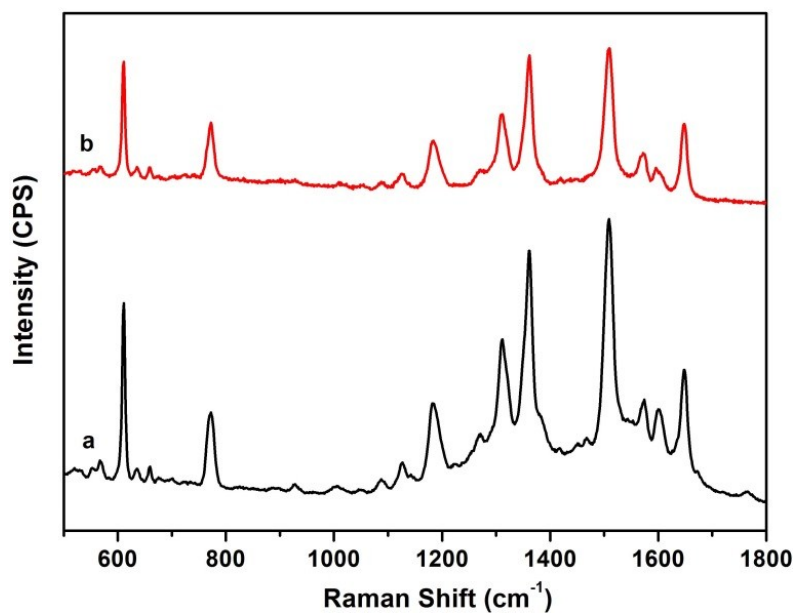

**Fig. S4** SERS spectra of R6G at a concentration of  $10^{-5}$  M collected from (a) Ag@MIPs and (b) Ag particles.

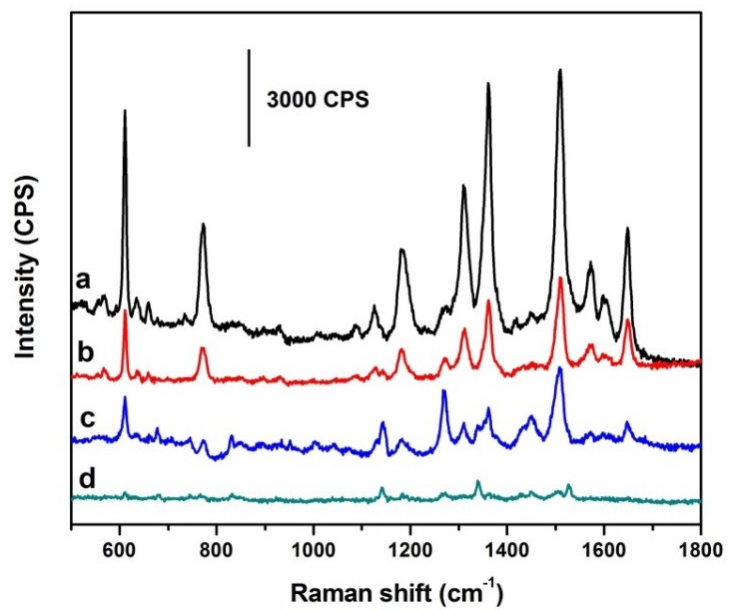

**Fig. S5** SERS spectra of R6G obtained from Ag particles at a concentration of (a)  $10^{-5}$  M, (b)  $10^{-6}$  M, (c)  $10^{-7}$  M and (d) 0 M.

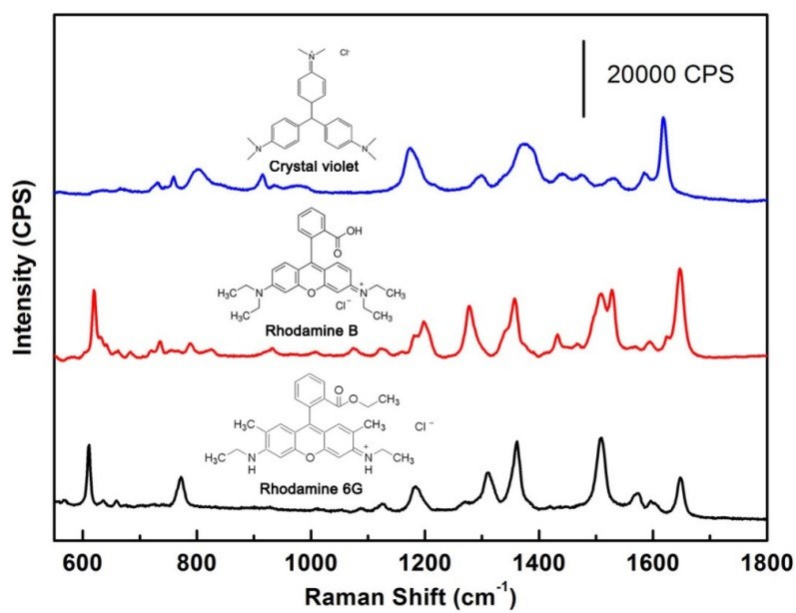

**Fig. S6** SERS spectra of R6G, RB and CV recorded from Ag spheres at a concentration of  $10^{-5}$  M and their corresponding molecular structures.

### Calculation of the enhancement factor (EF)

The enhancement factor was estimated according to the following equation:

$$EF = \frac{I_{SERS} / c_{SERS}}{I_{NR} / c_{NR}}$$

Where  $I_{SERS}$  and  $I_{NR}$  are peak intensities of SERS and normal Raman spectra at the same position.  $c_{SERS}$  and  $c_{NR}$  present solution concentration used in measuring SERS and Raman spectra.
